# Supplementary material for: Composition-Dependent Cytotoxic and Antibacterial Activity of Biopolymer-Capped Ag/Au Bimetallic Nanoparticles against Melanoma and Multidrug-Resistant Pathogens
Source: MDPI journal article supplement (doi:10.3390/nano12050779), 2022-02-25
Supplement: s1 [file s1]

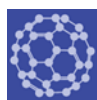

# Composition-dependent cytotoxic and antibacterial activity of biopolymer-capped Ag/Au bimetallic nanoparticles against melanoma and multidrug-resistant pathogens

Alfonso Nieto-Argüello <sup>1</sup>, David Medina-Cruz <sup>2</sup>, Yeremi S. Pérez-Ramírez <sup>1</sup>, Sergio A. Pérez-García <sup>3</sup>, Miguel. A. Velasco-Soto <sup>1</sup>, Zeinab Jafari <sup>1</sup>, Israel De Leon <sup>1</sup>, María Ujué González <sup>4</sup>, Yves Huttel <sup>5</sup>, Lidia Martínez <sup>5</sup>, Álvaro Mayoral <sup>6,7,8</sup>, Thomas J. Webster <sup>2</sup>, José M. García-Martín <sup>4</sup> and Jorge L. Cholula-Díaz <sup>1,\*</sup>

<sup>1</sup> School of Engineering and Sciences, Tecnológico de Monterrey, Eugenio Garza Sada 2501, Monterrey 64849, N.L., Mexico; alfonsonieto25@gmail.com (A.N.-A.); yeremi\_said@hotmail.com (Y.S.P.-R.); miguel.velasco85@tec.mx (M.A.V.-S.); ZJafari@tec.mx (Z.J.); ideleon@tec.mx (I.D.L.)

<sup>2</sup> Department of Chemical Engineering, Northeastern University, Boston, MA 02115, USA; davidmedina-cruz@gmail.com (D.M.-C.); websterthomas02@gmail.com (T.J.W.)

<sup>3</sup> Centro de Investigación en Materiales Avanzados, S. C. (CIMAV), Unidad Monterrey, Alianza Norte 202, C.P. 66628, Apodaca, NL, Mexico; alfonso.perez@cimav.edu.mx

<sup>4</sup> Instituto de Micro y Nanotecnología, IMN-CNM, CSIC (CEI UAM+CSIC), Isaac Newton 8, Tres Cantos 28760, Spain; maria-ujue.gonzalez@csic.es (M.U.-G.); josemiguel.garcia.martin@csic.es (J.M.G.-M.)

<sup>5</sup> Instituto de Ciencia de Materiales de Madrid, ICMM-CSIC, Sor Juana Inés de la Cruz 3, Madrid 28049, Spain; huttel@icmm.csic.es (Y.H.); lidia.martinez@icmm.csic.es (L.M.)

<sup>6</sup> Instituto de Nanociencia y Materiales de Aragón (INMA), CSIC-Universidad de Zaragoza, Pedro Cerbuna, Zaragoza 50009, Spain; amayoral@unizar.es

<sup>7</sup> Laboratorio de Microscopías Avanzadas (LMA), Universidad de Zaragoza, Zaragoza 50018, Spain

<sup>8</sup> Center for High-Resolution Electron Microscopy (ChEM), School of Physical Science and Technology (SPST), ShanghaiTech University, 393 Middle Huaxia Road, Pudong, 201210, Shanghai, China

\* Correspondence: jorgeluis.cholula@tec.mx

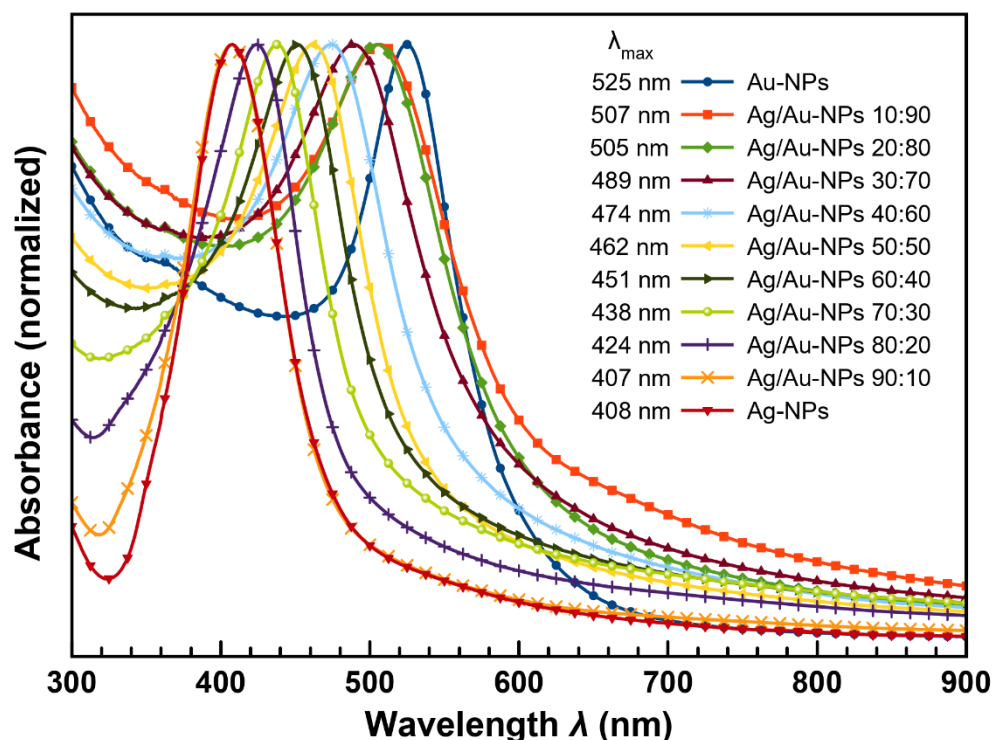

**Figure S1.** Normalized absorption spectra of colloidal Ag/Au-NPs in the complete atomic chemical composition range with steps of 10 at%.

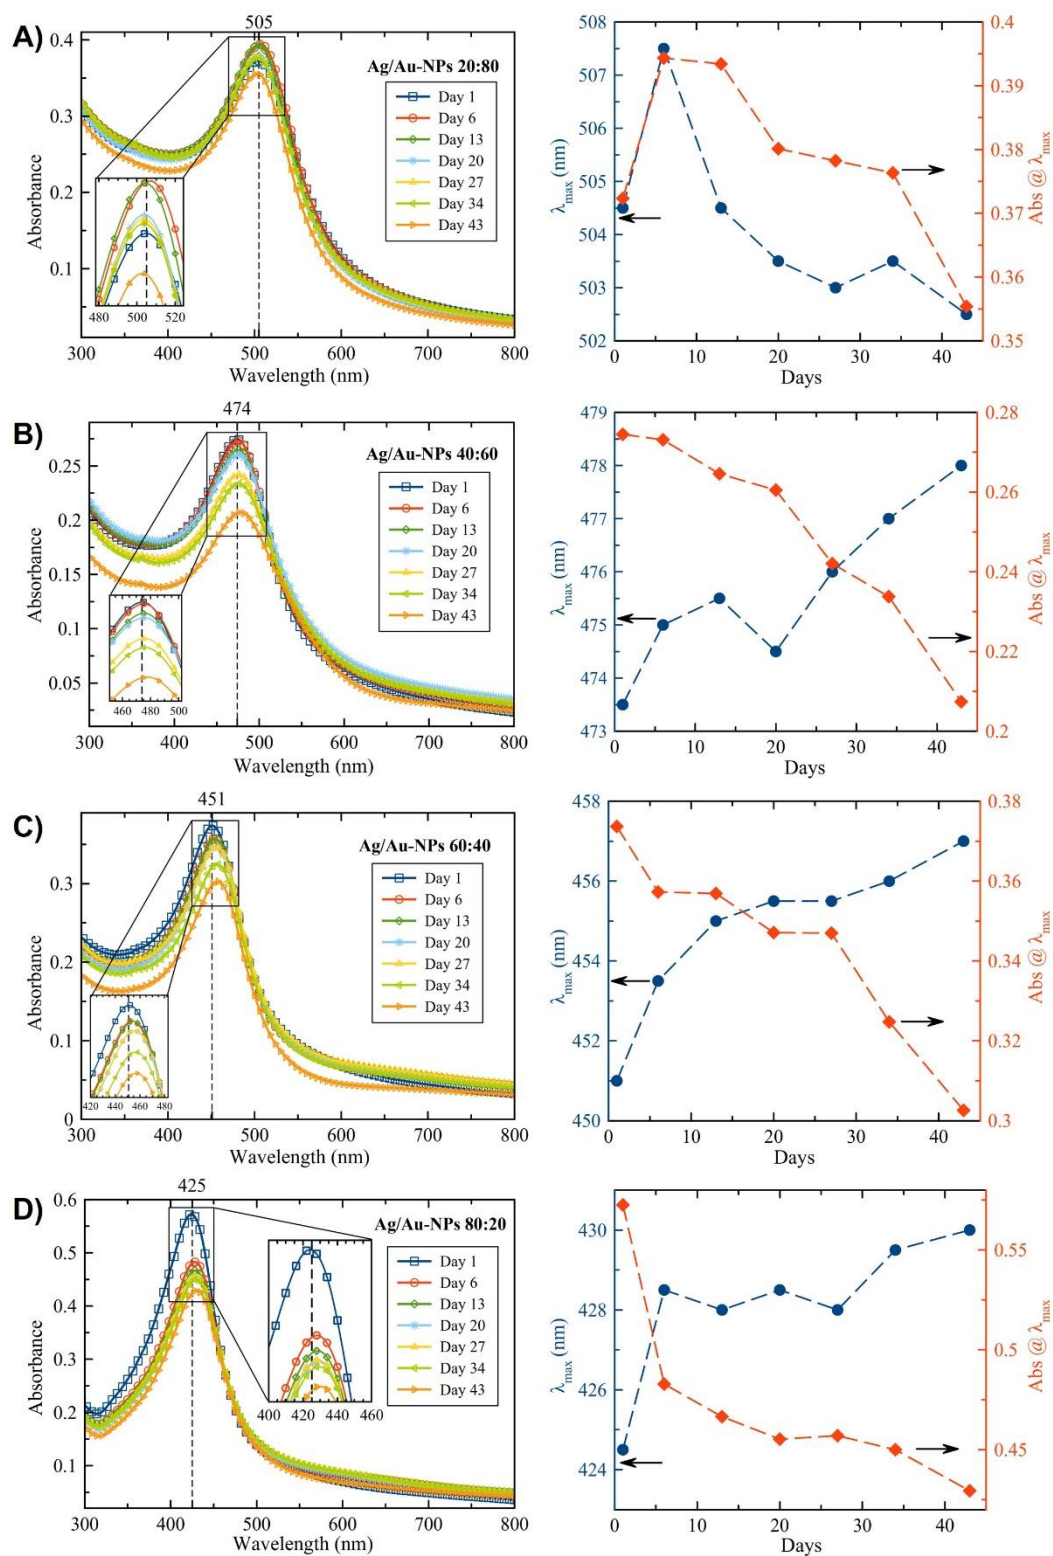

**Figure S2.** Study of the stability over the time of Ag/Au-NPs. Absorption spectra (left panels) and shift of  $\lambda_{\text{max}}$  and absorbance at the given  $\lambda_{\text{max}}$  as a function of time (right panels) for colloidal Ag/Au-NPs with Ag:Au ratio of **A)** 20:80, **B)** 40:60, **C)** 60:40, **D)** 80:20.

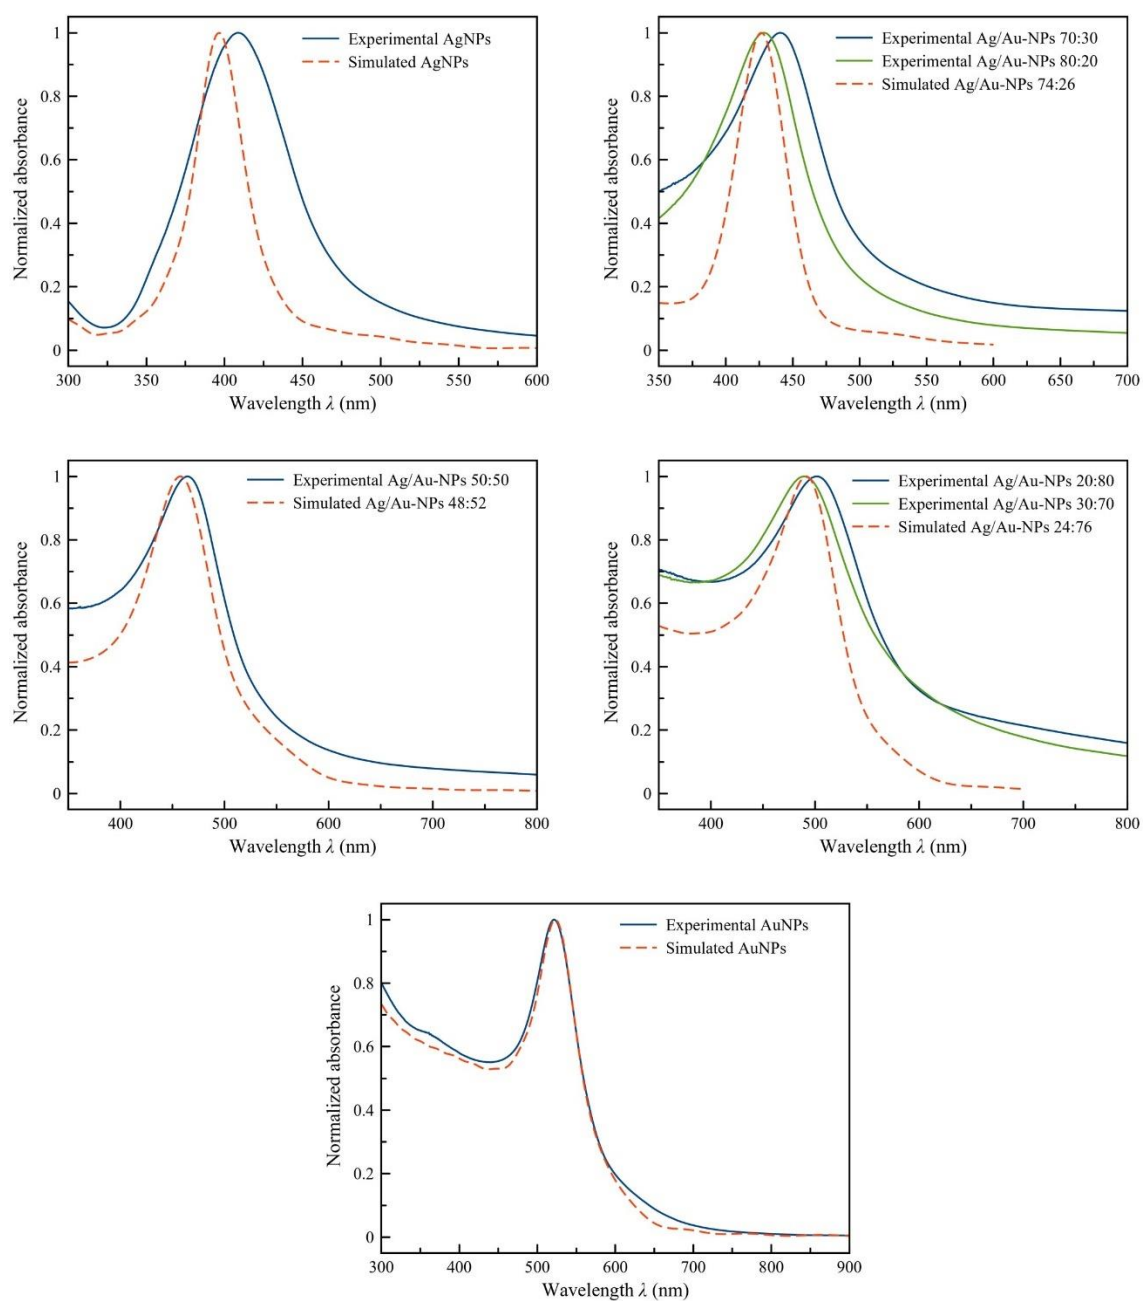

**Figure S3.** Comparisons between simulated and experimental absorption spectra for Ag/Au-NPs with different chemical compositions. The simulated spectra were calculated using 3D FDTD analysis.

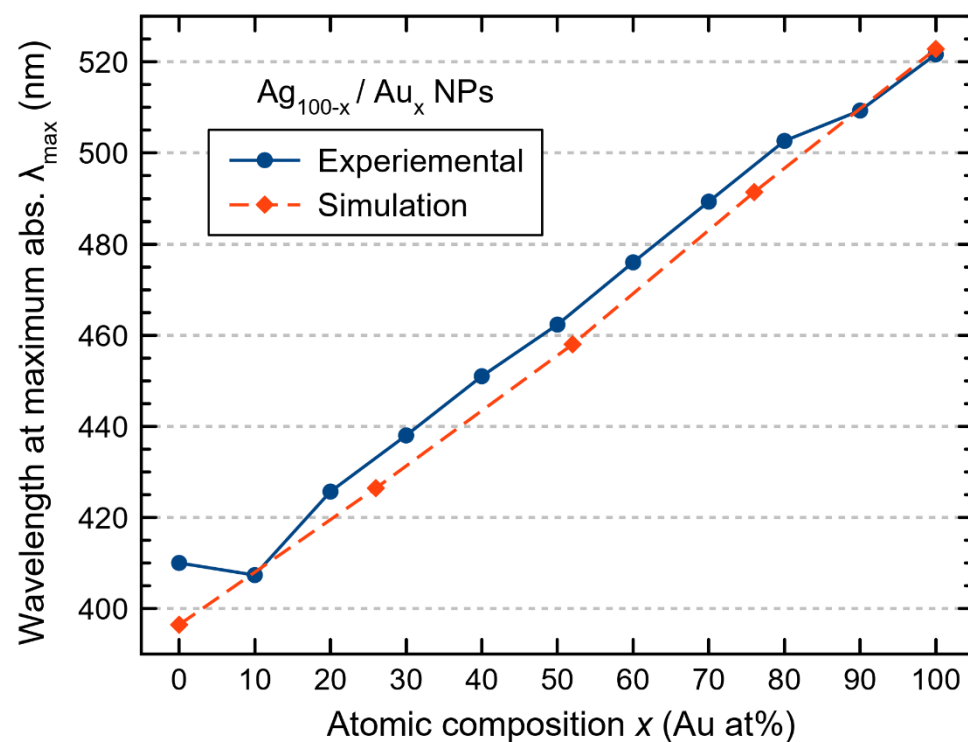

**Figure S4.** Comparison between the LSPR band positions obtained in the 3D FDTD simulations and the experimental values.

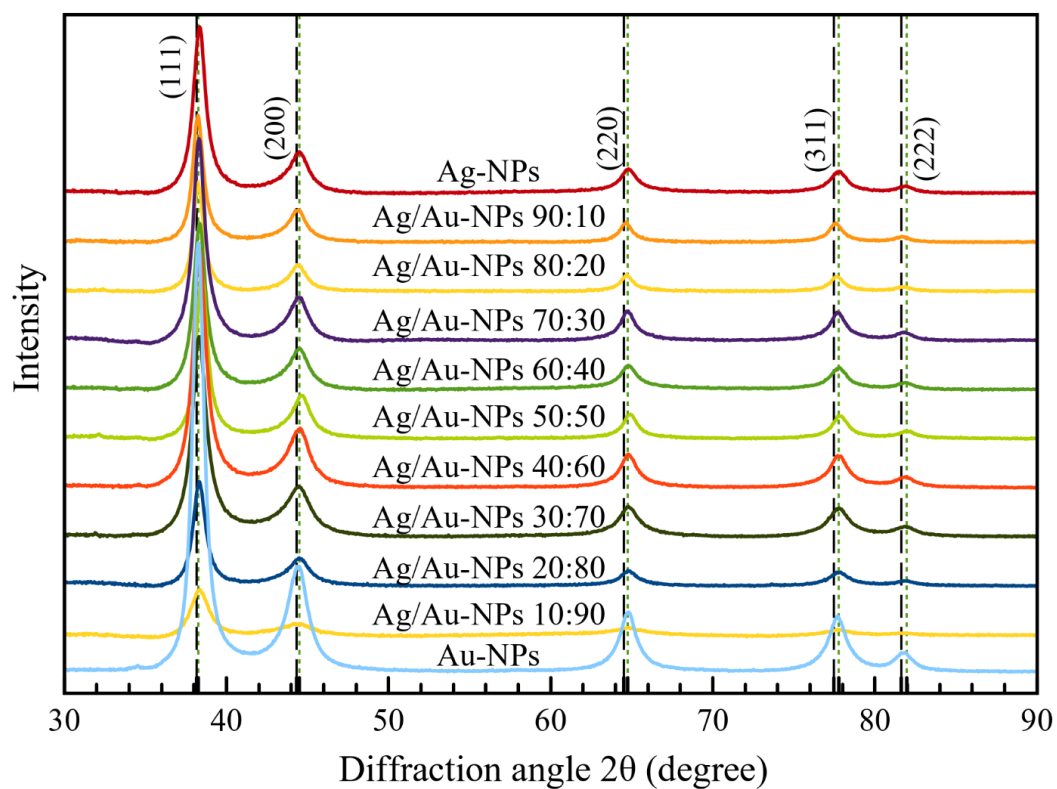

**Figure S5.** XRD spectra of the Ag/Au-NPs with different chemical compositions. Discontinuous and dotted lines correspond to expected diffraction peaks for FCC Ag and Au<sup>1</sup>, respectively.

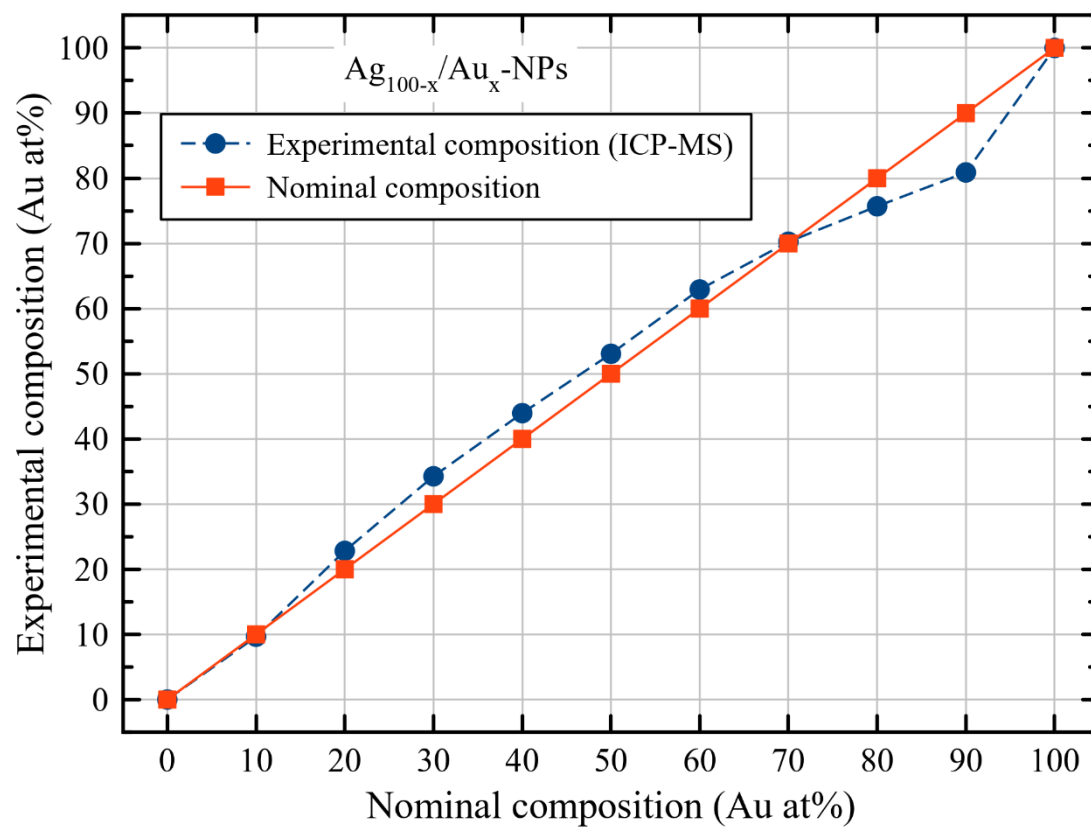

**Figure S6.** Experimental chemical composition (blue dots) of the Ag/Au-NPs found by ICP-MS as a function of nominal composition. The red squares correspond to the nominal composition of each sample. The blue dashed and red lines are guides for the eye.

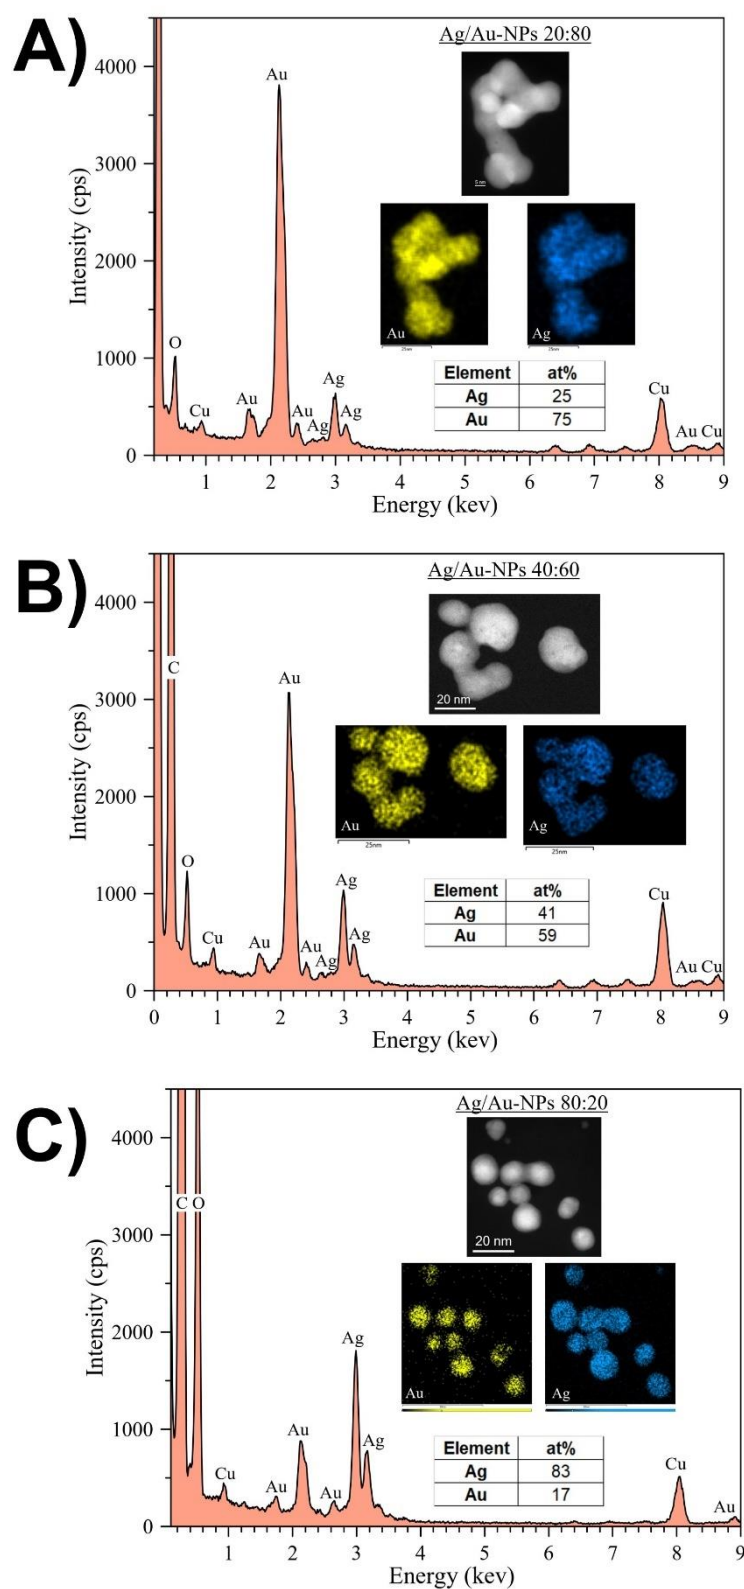

**Figure S7.** EDX spectra of Ag/Au-NPs with Ag:Au ratio of **A)** 20:80; **B)** 40:60; and **C)** 80:20.

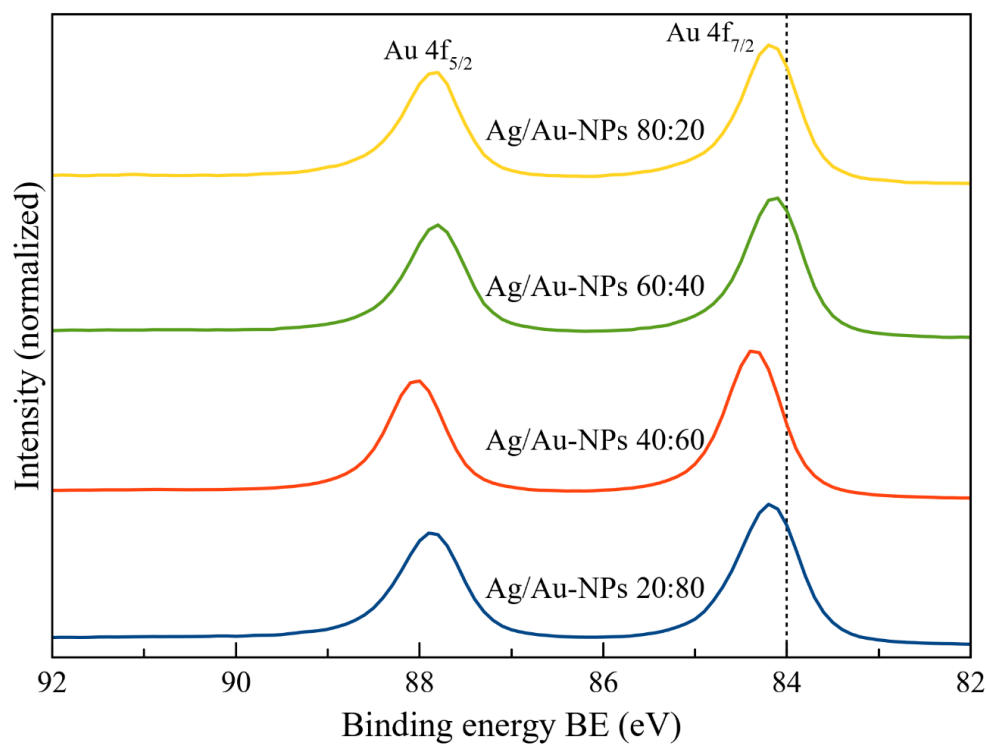

**Figure S8.** Au 4f core level peak for Ag/Au-NPs with Ag:Au ratio of 20:80, 40:60, 60:40 and 80:20. The dotted line correspond to the BE of Au 4f<sub>7/2</sub> (84.0 eV) found in bulk Au<sup>2</sup>.

**Table S1.** Experimental conditions for the synthesis of Ag/Au-NP colloids. In all samples, 500  $\mu\text{L}$  of starch 1% (w/v) solution was used.

| Atomic Ratio (Ag:Au) | AgNO <sub>3</sub> 25 mM Solution ( $\mu\text{L}$ ) | NaAuCl <sub>4</sub> 25 mM Solution ( $\mu\text{L}$ ) |
|----------------------|----------------------------------------------------|------------------------------------------------------|
| 100:0                | 250                                                | 0                                                    |
| 90:10                | 450                                                | 50                                                   |
| 80:20                | 400                                                | 100                                                  |
| 70:30                | 350                                                | 150                                                  |
| 60:40                | 300                                                | 200                                                  |
| 50:50                | 250                                                | 250                                                  |
| 40:60                | 200                                                | 300                                                  |
| 30:70                | 150                                                | 350                                                  |
| 20:80                | 100                                                | 400                                                  |
| 10:90                | 50                                                 | 450                                                  |
| 0:100                | 0                                                  | 250                                                  |



**Table S2.** Crystallite size ( $L$ ) Ag/Au-NPs extracted from XRD analysis (Figure S5).

| Ag/Au-NP Sample | Crystallite Size ( $L$ , in nm) |
|-----------------|---------------------------------|
| 100:0           | $15.3 \pm 2.6$                  |
| 90:10           | $12.9 \pm 3.9$                  |
| 80:20           | $13.1 \pm 2.1$                  |
| 70:30           | $11.4 \pm 1.7$                  |
| 60:40           | $9.6 \pm 2.7$                   |
| 50:50           | $10.6 \pm 2$                    |
| 40:60           | $8.7 \pm 1.7$                   |
| 30:70           | $6.7 \pm 1.3$                   |
| 20:80           | $8.3 \pm 1.1$                   |
| 10:90           | $7.6 \pm 2.8$                   |
| 0:100           | $11.2 \pm 3.8$                  |

**Table S3.** Shift of the binding energy ( $\Delta BE$ ) for Ag 3d<sub>5/2</sub> and Au 4f<sub>7/2</sub> with respect to the bulk values (368.1 and 84.0 eV, respectively) of selected Ag/Au-NP samples obtained from the Ag 3d (Figure 7B) and Au 4f (Figure S8) core level peaks.

| Ag/Au-NP Sample | Ag 3d <sub>5/2</sub> Shift (eV) | Au 4f <sub>7/2</sub> Shift (eV) |
|-----------------|---------------------------------|---------------------------------|
| 20:80           | 0.1                             | 0.18                            |
| 40:60           | 0.28                            | 0.36                            |
| 60:40           | 0.31                            | 0.33                            |
| 80:20           | 0.41                            | 0.38                            |

**Table S4.** Chemical composition of selected Ag/Au-NP samples extracted from the Ag3d (Figure 7B) and Au4f (Figure S8) core level peaks for Ag and Au, respectively.

| Ag/Au-NP Sample | Expected Atomic Ratio<br>Ag:Au | Experimental Atomic Ratio<br>Ag:Au |
|-----------------|--------------------------------|------------------------------------|
| 20:80           | 0.25                           | 0.27                               |
| 40:60           | 0.67                           | 0.65                               |
| 60:40           | 1.50                           | 1.52                               |
| 80:20           | 4.00                           | 3.80                               |
